# Supplementary material
Source: publisher figshare collection journal article supplement (https://acs.figshare.com/ndownloader/files/5769246)
Supplement: Supplementary file 1 [file 5769246]

**Figure S1. Inhibitory effect of 8-BuS-ATP, 6e, on ATP hydrolysis by NTPDase.**

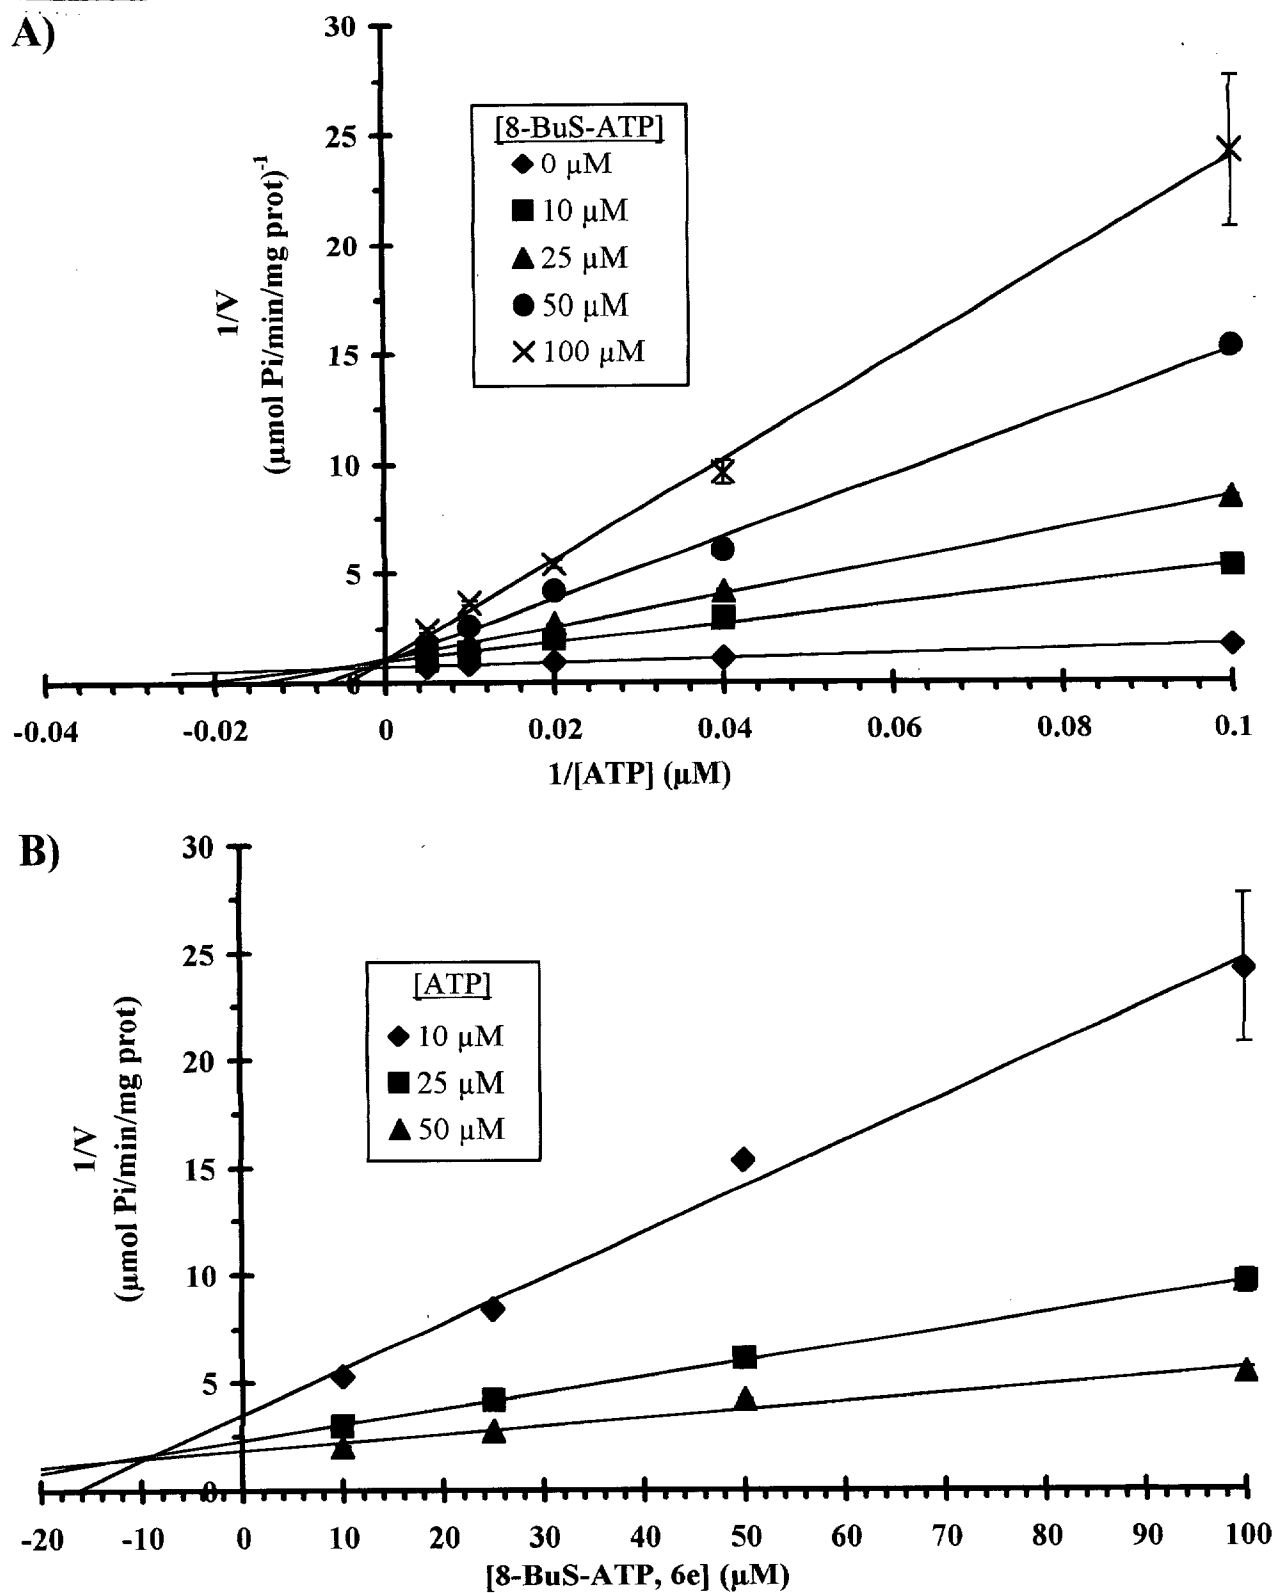

8-BuS-ATP produce a competitive inhibition with an estimated  $K_i$  of 10  $\mu\text{M}$ . Results are expressed as the mean  $\pm$  SEM of two experiments each in duplicate.

Figure S2. Dixon representations of 8-CH<sub>2</sub>tBuS-ATP, 6b, (A) and 8-cycloheptylS-ATP, 6a, (B) inhibition.

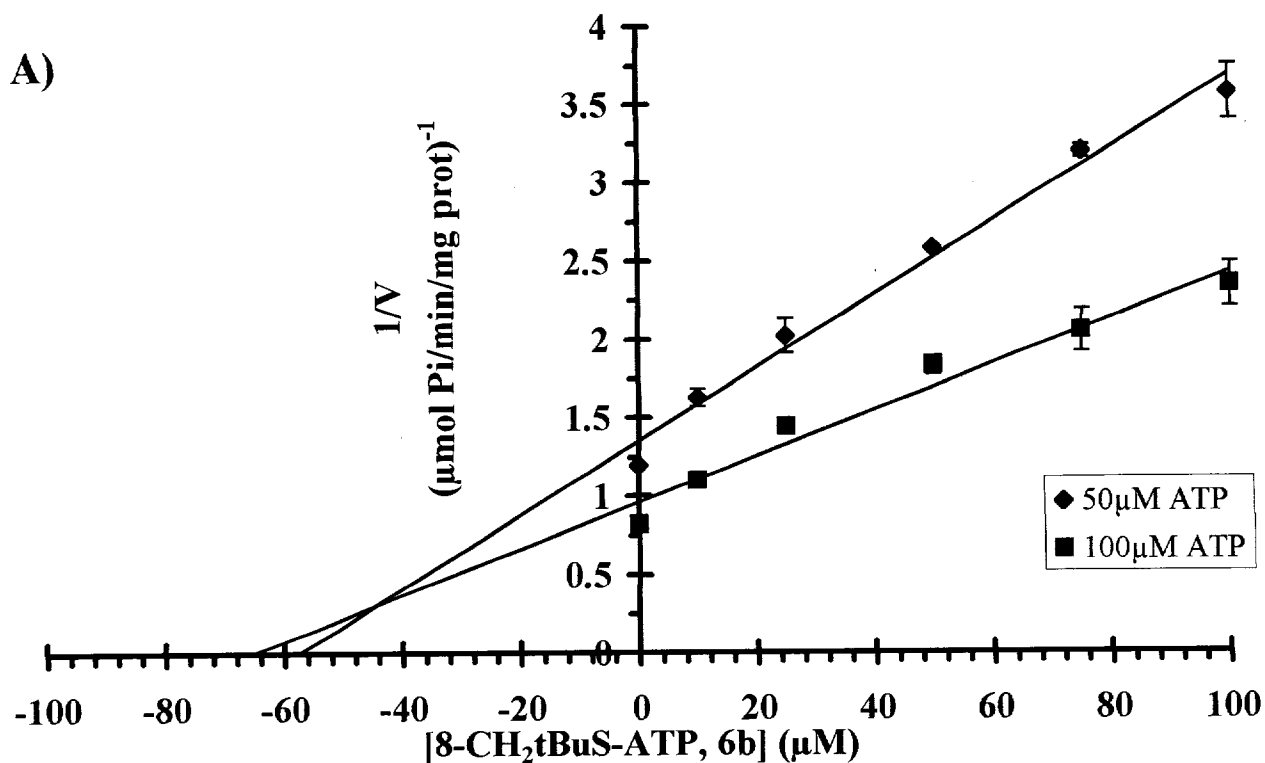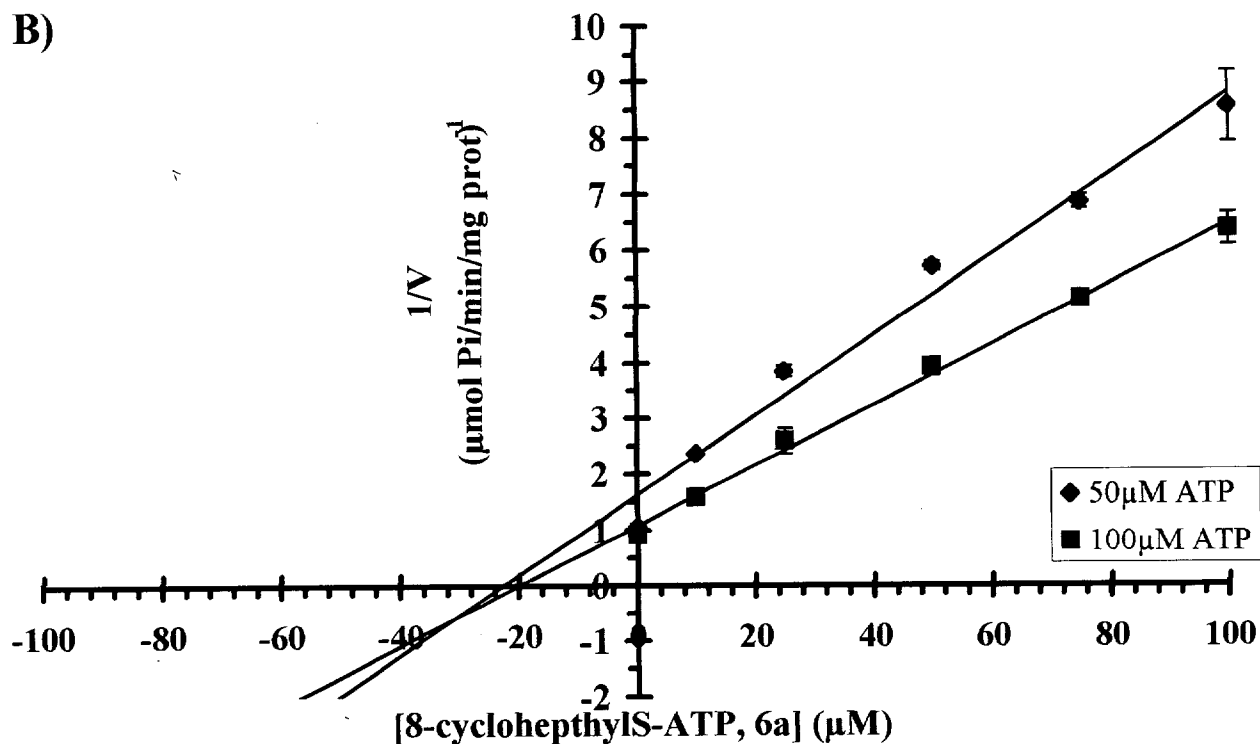

Both analogues act as mixed type inhibitors with estimated  $K_i$  of 45 and 31  $\mu\text{M}$  for 8-tBuCH<sub>2</sub> ATP, 6b, and 8-cycloheptylS-ATP, 6a, respectively. Experiments were carried out in triplicate and expressed as the mean  $\pm$  SEM.

Figure S3. A) Hydrolysis of 8-thioethyl-ATP, 6c, by NTPDase. B) Dixon representation of 8-thiohexyl, 6d, inhibition.

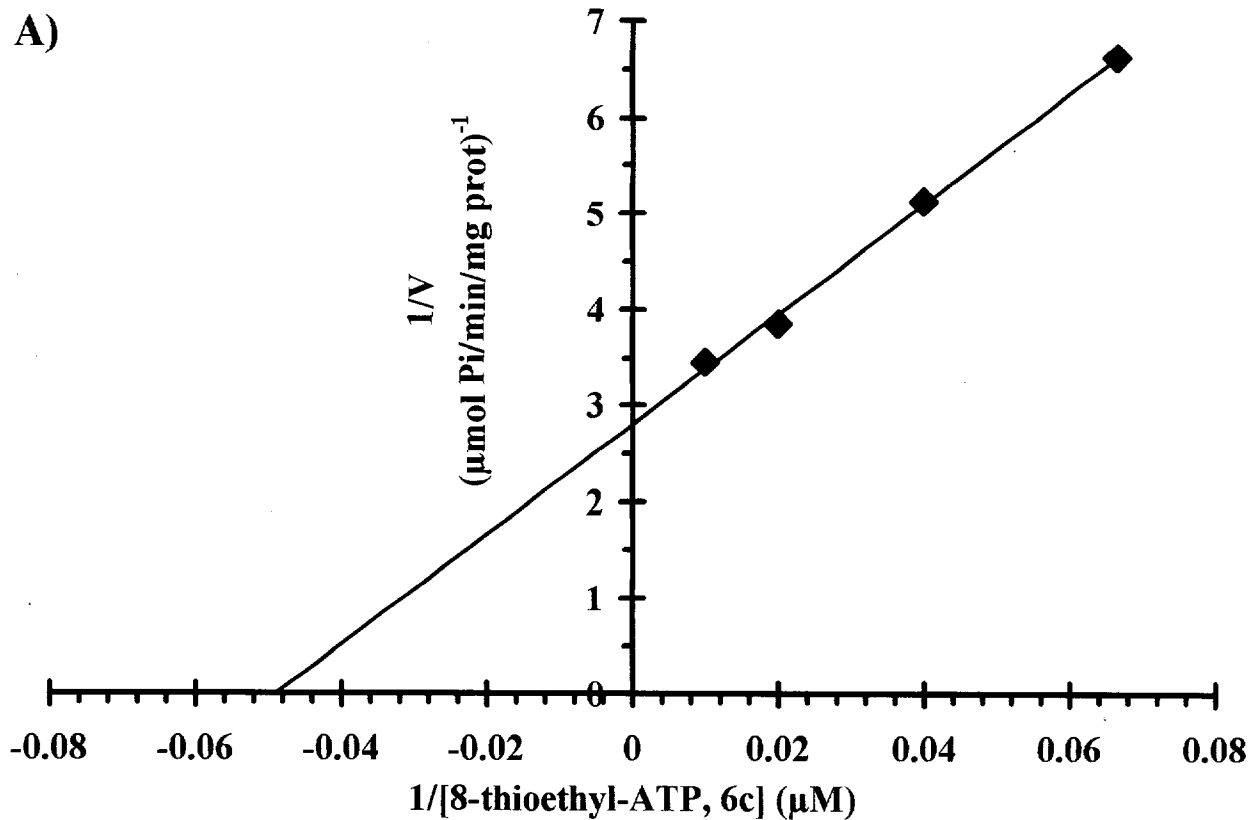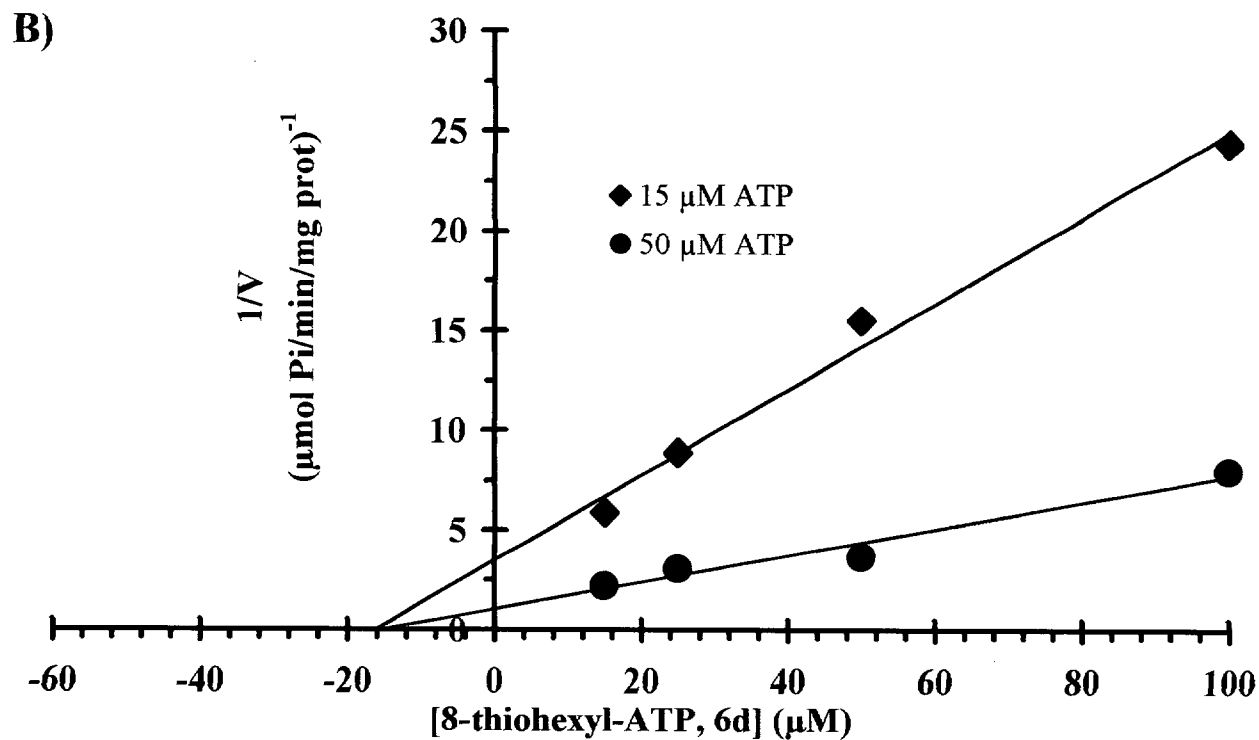

Analogue **6d** act as a non-competitive inhibitor with an estimated  $K_i$  of 16  $\mu\text{M}$ . Experiments was carried out in triplicate and expressed as the mean  $\pm$  SEM.
